# Supplementary material for: A quantitative measure of halogen bond activation in cocrystallization
Source: Royal Society of Chemistry journal article supplement (doi:10.1039/c7cp03322b), 2017-01-01
Supplement: c7cp03322b1.pdf [file c7cp03322b1.pdf]

## SUPPLEMENTARY INFORMATION

### A quantitative measure of halogen bond activation in cocrystallization

Lucia Carlucci\* and Angelo Gavezzotti\*

*Dipartimento di Chimica, Università degli Studi di Milano, via C. Golgi, 19, 20133 Milano, Italy.  
Email: lucia.carlucci@unimi.it, angelo.gavezzotti@unimi.it*

**Table S1.** Atomic coordinates of all the molecular models employed in this work.

For each atom: x,y,z (angstrom), atomic species indicator (codes: 41 fluorine, 44 iodine, 11 acetylenic carbon, 12 aromatic carbon, 20 nitro nitrogen, 30 nitro oxygen, 18 pyrazine nitrogen, 2 hydrogen).

See also Table 1 of the CLP manual available at [www.angelogavezzotti.it](http://www.angelogavezzotti.it) for all parameters used in the PIXEL calculations.

pyrazine

|    |     |          |         |    |
|----|-----|----------|---------|----|
| 10 |     |          |         |    |
| 1  | 0.0 | 0.00000  | 0.00000 | 18 |
| 2  | 0.0 | 1.12790  | 0.70480 | 12 |
| 3  | 0.0 | 1.12790  | 2.09480 | 12 |
| 4  | 0.0 | 0.00000  | 2.79960 | 18 |
| 5  | 0.0 | -1.12790 | 2.09480 | 12 |
| 6  | 0.0 | -1.12790 | 0.70480 | 12 |
| 7  | 0.0 | 2.07249  | 0.18121 | 2  |
| 8  | 0.0 | 2.07249  | 2.61839 | 2  |
| 9  | 0.0 | -2.07249 | 2.61839 | 2  |
| 10 | 0.0 | -2.07249 | 0.18121 | 2  |

pentafluoriodobenzene

|    |     |          |          |    |
|----|-----|----------|----------|----|
| 12 |     |          |          |    |
| 1  | 0.0 | 0.00000  | 0.00000  | 44 |
| 2  | 0.0 | 0.00000  | -2.08000 | 12 |
| 3  | 0.0 | 1.19510  | -2.77000 | 12 |
| 4  | 0.0 | 1.19510  | -4.15000 | 12 |
| 5  | 0.0 | 0.00000  | -4.84000 | 12 |
| 6  | 0.0 | -1.19510 | -4.15000 | 12 |
| 7  | 0.0 | -1.19510 | -2.77000 | 12 |
| 8  | 0.0 | 2.35560  | -2.10000 | 41 |
| 9  | 0.0 | 2.35560  | -4.82000 | 41 |
| 10 | 0.0 | 0.00000  | -6.22000 | 41 |
| 11 | 0.0 | -2.35560 | -4.82000 | 41 |
| 12 | 0.0 | -2.35560 | -2.10000 | 41 |

iodo-3,5-dinitrobenzene

|    |     |          |          |    |
|----|-----|----------|----------|----|
| 16 |     |          |          |    |
| 1  | 0.0 | 0.00000  | 0.00000  | 44 |
| 2  | 0.0 | 0.00000  | -2.10000 | 12 |
| 3  | 0.0 | 1.19940  | -2.79250 | 12 |
| 4  | 0.0 | 1.19940  | -4.17750 | 12 |
| 5  | 0.0 | 0.00000  | -4.87000 | 12 |
| 6  | 0.0 | -1.19940 | -4.17750 | 12 |
| 7  | 0.0 | -1.19940 | -2.79250 | 12 |
| 8  | 0.0 | 2.47246  | -4.91249 | 20 |
| 9  | 0.0 | 3.50708  | -4.26598 | 30 |
| 10 | 0.0 | 2.42990  | -6.13175 | 30 |
| 11 | 0.0 | -2.47246 | -4.91249 | 20 |
| 12 | 0.0 | -2.42990 | -6.13175 | 30 |
| 13 | 0.0 | -3.50708 | -4.26598 | 30 |
| 14 | 0.0 | 2.13480  | -2.25250 | 2  |
| 15 | 0.0 | 0.00000  | -5.95000 | 2  |
| 16 | 0.0 | -2.13480 | -2.25250 | 2  |

iodobenzene

|    |     |          |          |    |
|----|-----|----------|----------|----|
| 12 |     |          |          |    |
| 1  | 0.0 | 0.00000  | 0.00000  | 44 |
| 2  | 0.0 | 0.00000  | -2.10000 | 12 |
| 3  | 0.0 | 1.19940  | -2.79250 | 12 |
| 4  | 0.0 | 1.19940  | -4.17750 | 12 |
| 5  | 0.0 | 0.00000  | -4.87000 | 12 |
| 6  | 0.0 | -1.19940 | -4.17750 | 12 |
| 7  | 0.0 | -1.19940 | -2.79250 | 12 |
| 8  | 0.0 | 2.13480  | -2.25250 | 2  |
| 9  | 0.0 | 2.13480  | -4.71750 | 2  |
| 10 | 0.0 | 0.00000  | -5.95000 | 2  |
| 11 | 0.0 | -2.13480 | -4.71750 | 2  |
| 12 | 0.0 | -2.13480 | -2.25250 | 2  |

iodo-4-nitrobenzene

|    |     |          |          |    |
|----|-----|----------|----------|----|
| 14 |     |          |          |    |
| 1  | 0.0 | 0.00000  | 0.00000  | 44 |
| 2  | 0.0 | 0.00000  | -2.10000 | 12 |
| 3  | 0.0 | 1.19940  | -2.79250 | 12 |
| 4  | 0.0 | 1.19940  | -4.17750 | 12 |
| 5  | 0.0 | 0.00000  | -4.87000 | 12 |
| 6  | 0.0 | -1.19940 | -4.17750 | 12 |
| 7  | 0.0 | -1.19940 | -2.79250 | 12 |
| 8  | 0.0 | 0.00000  | -6.34000 | 20 |
| 9  | 0.0 | 1.07720  | -6.91275 | 30 |
| 10 | 0.0 | -1.07720 | -6.91275 | 30 |
| 11 | 0.0 | 2.13480  | -2.25250 | 2  |
| 12 | 0.0 | 2.13480  | -4.71750 | 2  |
| 13 | 0.0 | -2.13480 | -4.71750 | 2  |
| 14 | 0.0 | -2.13480 | -2.25250 | 2  |

iodoethynylbenzene

|    |     |         |          |    |
|----|-----|---------|----------|----|
| 14 |     |         |          |    |
| 1  | 0.0 | 0.00000 | 0.00000  | 44 |
| 2  | 0.0 | 0.00000 | -2.01000 | 11 |

|    |     |          |          |    |
|----|-----|----------|----------|----|
| 3  | 0.0 | 0.00000  | -3.21000 | 11 |
| 4  | 0.0 | 0.00000  | -4.65000 | 12 |
| 5  | 0.0 | 1.19940  | -5.34250 | 12 |
| 6  | 0.0 | 1.19940  | -6.72750 | 12 |
| 7  | 0.0 | 0.00000  | -7.42000 | 12 |
| 8  | 0.0 | -1.19940 | -6.72750 | 12 |
| 9  | 0.0 | -1.19940 | -5.34250 | 12 |
| 10 | 0.0 | 2.13480  | -4.80250 | 2  |
| 11 | 0.0 | 2.13480  | -7.26750 | 2  |
| 12 | 0.0 | 0.00000  | -8.50000 | 2  |
| 13 | 0.0 | -2.13480 | -7.26750 | 2  |
| 14 | 0.0 | -2.13480 | -4.80250 | 2  |

iodoethynyl-4-nitrobenzene

|    |     |          |          |    |
|----|-----|----------|----------|----|
| 16 |     |          |          |    |
| 1  | 0.0 | 0.00000  | 0.00000  | 44 |
| 2  | 0.0 | 0.00000  | -2.01000 | 11 |
| 3  | 0.0 | 0.00000  | -3.21000 | 11 |
| 4  | 0.0 | 0.00000  | -4.65000 | 12 |
| 5  | 0.0 | 1.19940  | -5.34250 | 12 |
| 6  | 0.0 | 1.19940  | -6.72750 | 12 |
| 7  | 0.0 | 0.00000  | -7.42000 | 12 |
| 8  | 0.0 | -1.19940 | -6.72750 | 12 |
| 9  | 0.0 | -1.19940 | -5.34250 | 12 |
| 10 | 0.0 | 0.00000  | -8.89000 | 20 |
| 11 | 0.0 | 1.07720  | -9.46275 | 30 |
| 12 | 0.0 | -1.07720 | -9.46275 | 30 |
| 13 | 0.0 | 2.13480  | -4.80250 | 2  |
| 14 | 0.0 | 2.13480  | -7.26750 | 2  |
| 15 | 0.0 | -2.13480 | -7.26750 | 2  |
| 16 | 0.0 | -2.13480 | -4.80250 | 2  |

bromoethynyl-4-nitrobenzene

|    |     |          |          |    |
|----|-----|----------|----------|----|
| 16 |     |          |          |    |
| 1  | 0.0 | 0.00000  | 0.00000  | 43 |
| 2  | 0.0 | 0.00000  | -1.80000 | 11 |
| 3  | 0.0 | 0.00000  | -3.00000 | 11 |
| 4  | 0.0 | 0.00000  | -4.44000 | 12 |
| 5  | 0.0 | 1.19940  | -5.13250 | 12 |
| 6  | 0.0 | 1.19940  | -6.51750 | 12 |
| 7  | 0.0 | 0.00000  | -7.21000 | 12 |
| 8  | 0.0 | -1.19940 | -6.51750 | 12 |
| 9  | 0.0 | -1.19940 | -5.13250 | 12 |
| 10 | 0.0 | 0.00000  | -8.68000 | 20 |
| 11 | 0.0 | 1.07720  | -9.25275 | 30 |
| 12 | 0.0 | -1.07720 | -9.25275 | 30 |
| 13 | 0.0 | 2.13480  | -4.59250 | 2  |
| 14 | 0.0 | 2.13480  | -7.05750 | 2  |

|    |     |          |          |   |
|----|-----|----------|----------|---|
| 15 | 0.0 | -2.13480 | -7.05750 | 2 |
| 16 | 0.0 | -2.13480 | -4.59250 | 2 |

chloroethynyl-4-nitrobenzene

|    |     |          |          |    |
|----|-----|----------|----------|----|
| 16 |     |          |          |    |
| 1  | 0.0 | 0.00000  | 0.00000  | 42 |
| 2  | 0.0 | 0.00000  | -1.63000 | 11 |
| 3  | 0.0 | 0.00000  | -2.83000 | 11 |
| 4  | 0.0 | 0.00000  | -4.27000 | 12 |
| 5  | 0.0 | 1.19940  | -4.96250 | 12 |
| 6  | 0.0 | 1.19940  | -6.34750 | 12 |
| 7  | 0.0 | 0.00000  | -7.04000 | 12 |
| 8  | 0.0 | -1.19940 | -6.34750 | 12 |
| 9  | 0.0 | -1.19940 | -4.96250 | 12 |
| 10 | 0.0 | 0.00000  | -8.51000 | 20 |
| 11 | 0.0 | 1.07720  | -9.08275 | 30 |
| 12 | 0.0 | -1.07720 | -9.08275 | 30 |
| 13 | 0.0 | 2.13480  | -4.42250 | 2  |
| 14 | 0.0 | 2.13480  | -6.88750 | 2  |
| 15 | 0.0 | -2.13480 | -6.88750 | 2  |
| 16 | 0.0 | -2.13480 | -4.42250 | 2  |

iodoethynyl-3,5-dinitrobenzene

|    |     |          |          |    |
|----|-----|----------|----------|----|
| 18 |     |          |          |    |
| 1  | 0.0 | 0.00000  | 0.00000  | 44 |
| 2  | 0.0 | 0.00000  | -2.01000 | 11 |
| 3  | 0.0 | 0.00000  | -3.21000 | 11 |
| 4  | 0.0 | 0.00000  | -4.65000 | 12 |
| 5  | 0.0 | 1.19940  | -5.34250 | 12 |
| 6  | 0.0 | 1.19940  | -6.72750 | 12 |
| 7  | 0.0 | 0.00000  | -7.42000 | 12 |
| 8  | 0.0 | -1.19940 | -6.72750 | 12 |
| 9  | 0.0 | -1.19940 | -5.34250 | 12 |
| 10 | 0.0 | 2.47246  | -7.46249 | 20 |
| 11 | 0.0 | 3.50708  | -6.81598 | 30 |
| 12 | 0.0 | 2.42990  | -8.68175 | 30 |
| 13 | 0.0 | -2.47246 | -7.46249 | 20 |
| 14 | 0.0 | -3.50708 | -6.81598 | 30 |
| 15 | 0.0 | -2.42990 | -8.68175 | 30 |
| 16 | 0.0 | 2.13480  | -4.80250 | 2  |
| 17 | 0.0 | 0.00000  | -8.50000 | 2  |
| 18 | 0.0 | -2.13480 | -4.80250 | 2  |

iodomethane

|   |          |          |          |    |
|---|----------|----------|----------|----|
| 5 |          |          |          |    |
| 1 | 0.0      | 0.00000  | 0.00000  | 44 |
| 2 | 0.0      | 0.00000  | -2.16000 | 13 |
| 3 | 0.0      | 1.01824  | -2.52000 | 3  |
| 4 | 0.88182  | -0.50912 | -2.52000 | 3  |
| 5 | -0.88182 | -0.50912 | -2.52000 | 3  |

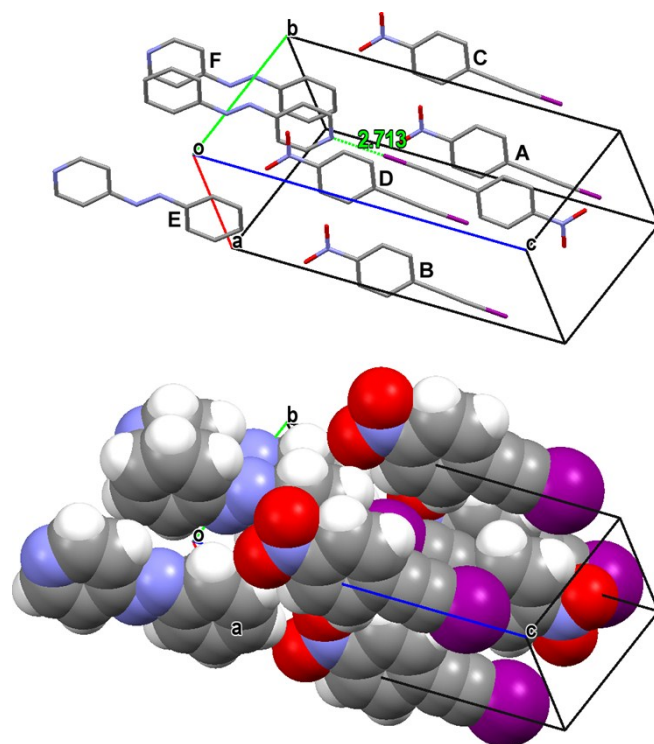

**Figure S1** Stick (top) and CPK (bottom) views of the unit cell of KUXBIQ showing the six A-F interaction types involving the 1-(iodoethynyl)-4-nitrobenzene 4-(phenyldiazenyl)pyridine halogen bonded dimer ( $N...I = 2.713 \text{ \AA}$ ). For clarity hydrogen atoms are not showed in the top view.
